# Supplementary material
Source: Springer Nature journal article supplement (https://www.springermedizin.de/resource/supplementary/12911_2011_518_MOESM9_ESM.pdf/9525982)

## PPV in different age groups

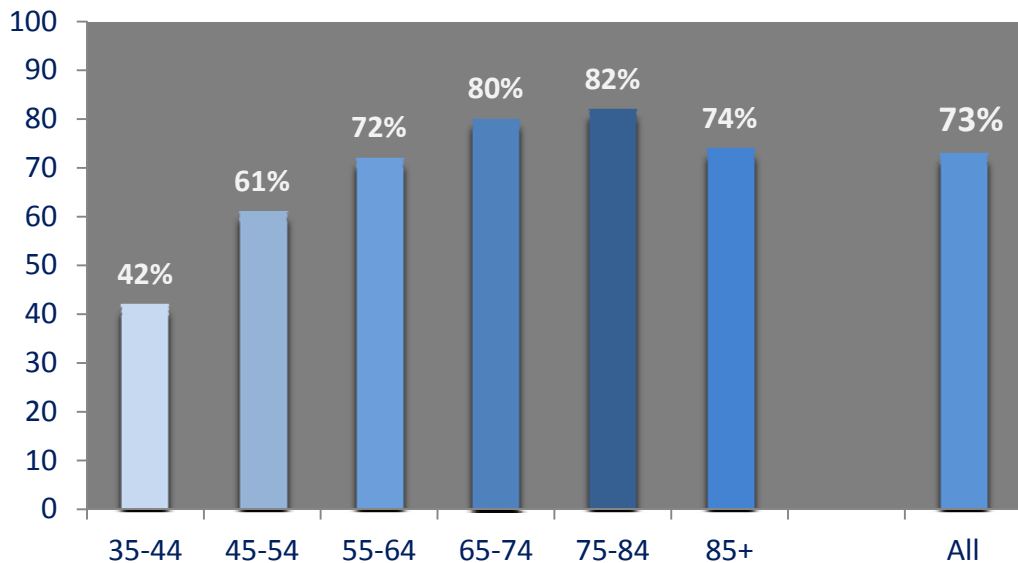

Supplement: MOESM9 [file 9525982]
